# Supplementary material
Source: HighWire-hosted journal article supplement (https://bjsm.bmj.com/content/bjsports-2019-101297)
Supplement: inline-supplementary-material-2 [file inline-supplementary-material-2.xlsx]

## Sheet: Sheet1
Supplemental Table 2. Injury Cause, Severity, and Competition Versus Training Definitions
Injury Cause Definitions
1. Contact with surface is defined as injury caused by athlete contact with the floor, i.e. on a landing or tumbling pass.
2. Contact with apparatus is defined as injury caused by athlete contact with the rings, pommel horse, vault, parallel bars, or high bar.
3. Non-contact trauma is defined as a traumatic event without contact with another athlete or object, i.e. hamstring injury while running.
4. Overuse/gradual is defined as an injury resulting from repeated micro-trauma without a single, identifiable event responsible for the injury.
5. Contact with self is defined as an injury caused by an athlete’s contact with himself.
Injury Severity Definitions
1. Full time loss was defined as an injury that resulted in the athlete being unable to return to the competition at all.
2. Partial time loss was defined as an injury that resulted in the athlete being unable to continue participation in one or more events but not all.
3. No time loss was defined as an injury that resulted in the athlete returning to the competition completely.
Competition Versus Training Definitions
1. Competition injuries were defined as injuries that occurred during competition.
2. Training injuries were defined as injuries that occurred during the available non-competition training sessions.
